# Supplementary material for: Switching the three-component Biginelli-like reaction conditions for the regioselective synthesis of new 2-amino[1,2,4]triazolo[1,5-a]pyrimidines
Source: Royal Society of Chemistry journal article supplement (doi:10.1039/d3ob01861j), 2023-12-19
Supplement: d3ob01861j1.pdf [file d3ob01861j1.pdf]

## Supplementary Information

### Switching the three-component Biginelli-like reaction conditions for the regioselective synthesis of new 2-amino[1,2,4]triazolo[1,5-*a*]pyrimidines

Martina Pacetti,<sup>a,#</sup> Maria Chiara Pismataro,<sup>a,#</sup> Tommaso Felicetti,<sup>a,\*</sup> Federica Giammarino,<sup>b</sup> Anna Bonomini,<sup>c</sup> Matteo Tiecco,<sup>d</sup> Chiara Bertagnin,<sup>c</sup> Maria Letizia Barreca,<sup>a</sup> Raimondo Germani,<sup>e</sup> Violetta Cecchetti,<sup>a</sup> Ilaria Vicenti,<sup>b</sup> Oriana Tabarrini,<sup>a</sup> Maurizio Zazzi,<sup>b</sup> Arianna Loregian,<sup>c</sup> and Serena Massari.<sup>a</sup>

<sup>a</sup> Department of Pharmaceutical Sciences, University of Perugia, 06123 Perugia, Italy;

<sup>b</sup> Department of Medical Biotechnologies, University of Siena, 53100 Siena, Italy;

<sup>c</sup> Department of Molecular Medicine, University of Padua, 35121 Padua, Italy;

<sup>d</sup> Chemistry Interdisciplinary Project (ChIP), School of Pharmacy, University of Camerino, 62032 Camerino, MC, Italy;

<sup>e</sup> Department of Chemistry, Biology and Biotechnology, University of Perugia, 06123 Perugia, Italy.

\*Corresponding author: Tommaso Felicetti, Department of Pharmaceutical Sciences, University of Perugia, 06123 Perugia, Italy; Tel: +39 075-5852185, *E-mail*: [tommaso.felicetti@unipg.it](mailto:tommaso.felicetti@unipg.it);

# Co-first authors

## Table of Contents

|                                                                                                                                                   |              |
|---------------------------------------------------------------------------------------------------------------------------------------------------|--------------|
| <b>Figure S1.</b> Superposition of <sup>13</sup> C NMR spectra of compounds <b>10</b> and <b>11</b> .                                             | Pag. S3      |
| <b>Figure S2.</b> Superposition of <sup>1</sup> H NMR spectra of compounds <b>10</b> and <b>11</b> .                                              | Pag. S3      |
| <b>Figure S3.</b> NOESY spectrum of compound <b>10</b> .                                                                                          | Pag. S4      |
| <b>Figure S4.</b> NOESY spectrum of compound <b>11</b> .                                                                                          | Pag. S4      |
| <b>Figure S5.</b> Superposition of <sup>1</sup> H NMR spectra of compounds <b>8</b> and <b>9</b> .                                                | Pag. S5      |
| <b>Figure S6.</b> Superposition of <sup>13</sup> C NMR spectra of compounds <b>8</b> and <b>9</b> .                                               | Pag. S5      |
| <b>Table S1.</b> <sup>13</sup> C NMR chemical shifts ( $\delta$ , ppm) of compounds <b>8-11</b> and <b>16-19</b> .                                | Pag. S6      |
| <b>Table S2.</b> Optimization of reaction conditions for <b>9</b> and <b>11</b> .                                                                 | Pag. S7      |
| <b>Table S3.</b> Optimization of reaction conditions for <b>9</b> .                                                                               | Pag. S8      |
| <b>Table S4.</b> Optimization of reaction conditions for <b>9</b> and <b>11</b> .                                                                 | Pag. S9      |
| <b>Table S5.</b> Optimization of reaction conditions for <b>8</b> and <b>10</b> .                                                                 | Pag. S10     |
| <b>Table S6.</b> Optimization of reaction conditions for <b>8</b> .                                                                               | Pag. S11     |
| <b>Scheme S1.</b> Plausible reaction mechanisms toward <b>10</b> and <b>11</b> .                                                                  | Pag. S12     |
| <b>Table S7.</b> Anti-DENV-2, anti-WNV, and anti-SARS-CoV-2 activity, and cytotoxicity of TZP derivatives <b>23-30</b> synthesized in this study. | Pag. S13     |
| <b>Figures S7-S38.</b> <sup>1</sup> H NMR and <sup>13</sup> C NMR spectra for compounds <b>8-11</b> , <b>16-19</b> , and <b>23-30</b> .           | Pag. S14-S29 |
| <b>Figures S39-S50.</b> HRMS analyses of compounds <b>8-11</b> and <b>23-30</b> .                                                                 | Pag. S30-S35 |
| <b>Figures S51-S58.</b> HPLC chromatograms of compounds <b>23-30</b> .                                                                            | Pag. S36-S39 |
| <b>Figures S59-S62.</b> FT-IR spectra for compounds <b>8-11</b> .                                                                                 | Pag. S40-S41 |



Figure S1. Superposition of <sup>13</sup>C NMR spectra of compounds **10** and **11**.



Figure S2. Superposition of <sup>1</sup>H NMR spectra of compounds **10** and **11**.



**Figure S3.** NOESY spectrum of compound 10.



**Figure S4.** NOESY spectrum of compound 11.



Figure S5. Superposition of  $^{13}\text{C}$  NMR spectra of compounds **8** and **9**.



Figure S6. Superposition of  $^1\text{H}$  NMR spectra of compounds **8** and **9**.

**Table S1.**  $^{13}\text{C}$  NMR chemical shifts ( $\delta$ , ppm) of compounds **8-11** and **16-19**.<sup>a</sup>

| Compd     | Structure                                                                           | C-2    | C-3    | C-5    | C-6    | C-7    | 6-CO <sub>2</sub> Et<br>6-CONHR | 5/7-<br>CH <sub>3</sub> |
|-----------|-------------------------------------------------------------------------------------|--------|--------|--------|--------|--------|---------------------------------|-------------------------|
| <b>8</b>  |    | 159.56 | 144.63 | 168.56 | 114.69 | 155.04 | 166.09<br>61.91<br>13.79        | 23.93                   |
| <b>17</b> |    | 158.87 | 142.24 | 167.99 | 119.80 | 154.69 | 167.16                          | 23.24                   |
| <b>19</b> |    | 159.13 | 142.90 | 168.24 | 119.41 | 154.90 | 163.53                          | 23.24                   |
| <b>9</b>  |    | 158.67 | 145.51 | 168.71 | 113.9  | 154.45 | 166.52<br>62.20<br>13.84        | 15.79                   |
| <b>16</b> |    | 155.73 | 142.02 | 167.29 | 117.78 | 153.07 | 166.52                          | 14.47                   |
| <b>18</b> |   | 157.24 | 143.85 | 168.61 | 118.61 | 154.41 | 164.01                          | 15.68                   |
| <b>11</b> |  | 164.09 | 144.88 | 154.11 | 101.12 | 53.15  | 165.92<br>60.40<br>14.64        | 15.73                   |
| <b>10</b> |  | 162.68 | 146.28 | 146.97 | 97.74  | 59.73  | 165.87<br>59.32<br>14.46        | 18.98                   |

<sup>a</sup>  $^{13}\text{C}$  NMR spectra of compounds in DMSO-*d*<sub>6</sub> recorded on Bruker Avance DRX-400MHz.

**Table S2.** Optimization of reaction conditions for **9** and **11**.<sup>a</sup>

| Entry          | Solvent    | Ratio<br>12:13:14 | Catalyst<br>(equiv)  | T°           | Time<br>(h)     | % Ratio<br>11:9:10:8 <sup>b</sup>     |                        |      |      |
|----------------|------------|-------------------|----------------------|--------------|-----------------|---------------------------------------|------------------------|------|------|
|                |            |                   |                      |              |                 | 11                                    | 9                      | 10   | 8    |
| 1              | EtOH       | 1:1:1             | citric acid<br>(2.5) | reflux       | 5               | 66<br>16% <sup>c</sup>                | 22                     | 12   | -    |
| 2              | EtOH       | 1:1:1             | citric acid<br>(5)   | reflux       | 4               | 58                                    | 32                     | 8    | 2    |
| 3              | EtOH       | 1:1.5:1           | citric acid<br>(2.5) | reflux       | 4               | 64                                    | 23                     | 12   | 1    |
| 4              | EtOH       | 1:1:1             | citric acid<br>(2.5) | reflux       | 3.5             | N.D. <sup>d</sup><br>83% <sup>c</sup> | N.D.                   | N.D. | N.D. |
| 5              | EtOH       | 1:1:1             | -                    | 100 °C<br>μw | 20 <sup>g</sup> | -                                     | -                      | -    | -    |
| 6 <sup>e</sup> | dry<br>THF | 1:1:1             | PTSA<br>(1)          | reflux       | 24              | 36                                    | 55                     | 7    | 2    |
| 7              | -          | 1:1:1             | phosphoric<br>acid   | 120 °C       | 6               | -                                     | -                      | -    | -    |
| 8              | -          | 1:1:1             | PPA                  | 120 °C       | 6               | -                                     | -                      | -    | -    |
| 9 <sup>e</sup> | AcOH       | 1:1:1             | -                    | reflux       | 6               | 11                                    | 61<br>21% <sup>c</sup> | 18   | 10   |

<sup>a</sup> The reaction was performed on 1.0 mmol scale of **12** in 3 mL of solvent. <sup>b</sup> Percentage ratio among isomers assessed by HPLC on the crude product. <sup>c</sup> Isolated yield. <sup>d</sup> N.D. = not determined due to the presence of only compound **11** by TLC. <sup>e</sup> Reaction performed under nitrogen.

**Table S3.** Optimization of reaction conditions for **9**.<sup>a</sup>

| Entry | Solvent | Ratio<br>12:13:14 | Catalyst<br>(equiv) | T <sup>o</sup> | Time<br>(h) | % Ratio<br>11:9:10:8 <sup>b</sup> |    |    |    |
|-------|---------|-------------------|---------------------|----------------|-------------|-----------------------------------|----|----|----|
|       |         |                   |                     |                |             | 11                                | 9  | 10 | 8  |
| 1     | AcOH    | 1:1:1             | -                   | 120 °C         | 3           | 17                                | 78 | 4  | 1  |
| 2     | AcOH    | 1:1:1             | -                   | 120 °C         | 6           | 6                                 | 89 | 4  | 1  |
|       |         |                   |                     |                |             | 37% <sup>c</sup>                  |    |    |    |
| 3     | AcOH    | 1:1:1             | -                   | 120 °C         | 12          | 2                                 | 92 | 4  | 2  |
| 4     | AcOH    | 1:1:1             | -                   | 120 °C         | 24          | 2                                 | 90 | 5  | 3  |
| 5     | AcOH    | 1:1:1             | -                   | 60 °C          | 3           | 45                                | 47 | 8  | -  |
| 6     | AcOH    | 1:1:1             | -                   | 60 °C          | 24          | 25                                | 69 | 5  | 1  |
| 7     | AcOH    | 2:1:1             | -                   | 120 °C         | 24          | 13                                | 53 | 19 | 15 |
| 8     | AcOH    | 1:2:1             | -                   | 120 °C         | 5           | 12                                | 68 | 13 | 7  |
| 9     | AcOH    | 1:3:1             | -                   | 120 °C         | 24          | 7                                 | 56 | 31 | 6  |
| 10    | AcOH    | 1:1:2             | -                   | 120 °C         | 24          | 6                                 | 85 | 4  | 5  |
| 11    | AcOH    | 1:1:3             | -                   | 120 °C         | 9           | 6                                 | 76 | 6  | 12 |

<sup>a</sup>The reaction was performed on 1.0 mmol scale of **12** in 3 mL of solvent in an open flask. <sup>b</sup>Percentage ratio among isomers assessed by HPLC on the crude product. <sup>c</sup> Isolated yield.

**Table S4.** Optimization of reaction conditions for **9** and **11**.<sup>a</sup>

| Entry | Solvent | Ratio<br>12:13:14 | Catalyst<br>(equiv)                        | T°              | Time<br>(h) | % Ratio<br>11:9:10:8 <sup>b</sup> |                    |    |    |
|-------|---------|-------------------|--------------------------------------------|-----------------|-------------|-----------------------------------|--------------------|----|----|
|       |         |                   |                                            |                 |             | 11                                | 9                  | 10 | 8  |
| 1     | AcOH    | 2:1:1             | -                                          | reflux          | 24          | 6                                 | 56                 | 19 | 19 |
| 2     | AcOH    | 1:2:1             | -                                          | reflux          | 24          | 13                                | $\frac{77}{51\%c}$ | 9  | 1  |
| 3     | AcOH    | 1:2:1             | -                                          | 60 °C           | 24          | 24                                | $\frac{63}{33\%c}$ | 9  | 4  |
| 4     | AcOH    | 1:3:1             | -                                          | 60 °C           | 9           | 13                                | $\frac{78}{55\%c}$ | 7  | 2  |
| 5     | AcOH    | 1:3:1             | -                                          | 90 °C           | 9           | 32                                | 39                 | 23 | 6  |
| 6     | AcOH    | 1:3:1             | -                                          | reflux          | 9           | 29                                | 34                 | 25 | 12 |
| 7     | AcOH    | 1:1:2             | -                                          | 60 °C           | 24          | 26                                | 70                 | 3  | 1  |
| 8     | AcOH    | 1:1:2             | -                                          | 90 °C           | 24          | 21                                | 60                 | 11 | 8  |
| 9     | AcOH    | 1:1:2             | -                                          | reflux          | 12          | 7                                 | $\frac{83}{23\%c}$ | 6  | 4  |
| 10    | AcOH    | 1:3:2             | -                                          | 60 °C           | 12          | 10                                | $\frac{85}{36\%c}$ | 3  | 2  |
| 11    | AcOH    | 1:3:1             | -                                          | 60 °C<br>μw     | 2.5         | 31                                | 48                 | 19 | 2  |
| 12    | AcOH    | 1:3:1             | H <sub>2</sub> O <sub>2</sub> <sup>d</sup> | 60-110 °C<br>μw | 2.75        | 7                                 | $\frac{72}{12\%c}$ | 7  | 15 |
| 13    | AcOH    | 1:3:1             | I <sub>2</sub><br>(0.5)                    | 60 °C           | 24          | 8                                 | 80                 | 5  | 7  |

<sup>a</sup> The reaction was performed on 1.0 mmol scale of **12** in 3 mL of solvent under nitrogen. <sup>b</sup> Percentage ratio among isomers assessed by HPLC on the crude product. <sup>c</sup> Isolated yield. <sup>d</sup> After 2 h at 60 °C, H<sub>2</sub>O<sub>2</sub> (1 mL) was added and the reaction was heated at 110 °C for 45'.

**Table S5.** Optimization of reaction conditions for **8** and **10**.<sup>a</sup>

| Entry | Solvent     | Ratio<br>12:13:14 | Catalyst                                   | T°     | Time<br>(h) | % Ratio<br>11:9:10:8 <sup>b</sup> |    |                                |                               |
|-------|-------------|-------------------|--------------------------------------------|--------|-------------|-----------------------------------|----|--------------------------------|-------------------------------|
|       |             |                   |                                            |        |             | 11                                | 9  | 10                             | 8                             |
| 1     | BMIM<br>MsO | 1:1:1             | -                                          | 120 °C | 48          | -                                 | 5  | 2                              | <u>93</u><br>30% <sup>c</sup> |
| 2     | TBMA<br>MsO | 1:1:1             | -                                          | 120 °C | 24          | -                                 | -  | <u>100</u><br>75% <sup>c</sup> | -                             |
| 3     | BMIM<br>TFB | 1:1:1             | -                                          | 120 °C | 24          | -                                 | 38 | 22                             | <u>40</u><br>25% <sup>c</sup> |
| 4     | BMIM<br>MsO | 1:2:1             | -                                          | 120 °C | 12          | -                                 | -  | -                              | -                             |
| 5     | TBMA<br>MsO | 1:2:1             | -                                          | 120 °C | 12          | -                                 | -  | -                              | -                             |
| 6     | BMIM<br>MsO | 1:2:1             | H <sub>2</sub> O <sub>2</sub> <sup>d</sup> | 120 °C | 24          | -                                 | 10 | 3                              | <u>87</u><br>40% <sup>c</sup> |
| 7     | TBMA<br>MsO | 1:2:1             | H <sub>2</sub> O <sub>2</sub> <sup>d</sup> | 120 °C | 24          | -                                 | 20 | 8                              | 72                            |
| 8     | BMIM<br>TFB | 1:2:1             | H <sub>2</sub> O <sub>2</sub> <sup>d</sup> | 120 °C | 24          | 1                                 | 29 | 2                              | 68                            |

<sup>a</sup> The reaction was performed on 1.0 mmol scale of **12** in 0.2 g of IL in an open flask. <sup>b</sup> Percentage ratio among isomers assessed by HPLC on the crude product. <sup>c</sup> Isolated yield. <sup>d</sup> H<sub>2</sub>O<sub>2</sub> (1 mL) was added after 12 h.

**Table S6.** Optimization of reaction conditions for **8**.<sup>a</sup>

| Entry | Solvent        | Ratio<br>12:13:14 | Catalyst                                   | T°     | Time<br>(h) | % Ratio<br>11:9:10:8 <sup>b</sup> |      |      |      |
|-------|----------------|-------------------|--------------------------------------------|--------|-------------|-----------------------------------|------|------|------|
|       |                |                   |                                            |        |             | 11                                | 9    | 10   | 8    |
| 1     | TBMA<br>TsO    | 1:2:1             | H <sub>2</sub> O <sub>2</sub> <sup>c</sup> | 120 °C | 24          | -                                 | 20   | -    | 80   |
| 2     | TBMP<br>MsO    | 1:2:1             | H <sub>2</sub> O <sub>2</sub> <sup>d</sup> | 120 °C | 7           | 1                                 | 28   | 25   | 46   |
| 3     | MMIM<br>TsO    | 1:2:1             | H <sub>2</sub> O <sub>2</sub> <sup>d</sup> | 120 °C | 7           | N.D. <sup>f</sup>                 | N.D. | N.D. | N.D. |
| 4     | TBA<br>TsO     | 1:2:1             | H <sub>2</sub> O <sub>2</sub> <sup>d</sup> | 120 °C | 7           | 1                                 | 18   | 31   | 50   |
| 5     | TBA<br>bromide | 1:2:1             | H <sub>2</sub> O <sub>2</sub> <sup>e</sup> | 120 °C | 34          | -                                 | 13   | -    | 87   |
| 6     | TBA<br>MsO     | 1:2:1             | H <sub>2</sub> O <sub>2</sub> <sup>c</sup> | 120 °C | 24          | -                                 | 7    | 11   | 82   |
| 7     | EG/TMG         | 1:2:1             | H <sub>2</sub> O <sub>2</sub> <sup>e</sup> | 120 °C | 34          | 1                                 | 26   | 1    | 72   |
| 8     | Gly/TMG        | 1:2:1             | H <sub>2</sub> O <sub>2</sub> <sup>e</sup> | 120 °C | 29          | -                                 | 50   | 14   | 36   |
| 9     | U/ChCl         | 1:2:1             | H <sub>2</sub> O <sub>2</sub> <sup>e</sup> | 120 °C | 34          | N.D.                              | N.D. | N.D. | N.D. |

<sup>a</sup>The reaction was performed on 1.0 mmol scale of **12** in 0.2 g di IL or DES in an open flask. <sup>b</sup>Percentage ratio among isomers assessed by HPLC on the crude product. H<sub>2</sub>O<sub>2</sub> (1 mL) was added after <sup>c</sup>20 h, <sup>d</sup>6 h, or <sup>e</sup>24 h. <sup>f</sup>N.D. = not determined.

**a) imine route****b) enamine route****c) Knoevenagel route****d) imine route****e) enamine route****f) Knoevenagel route**

**Scheme S1.** Plausible reaction mechanisms toward **11** (a-c) and **10** (d-f). **(a)** Imine route entailing an initial direct addition of the amino group at the C(3) position of **12** on the carbonyl carbon of benzaldehyde **13** to give an iminium intermediate, which reacts with ethyl 3-oxobutanoate **14**; **(b)** enamine route entailing an initial direct addition of the N(2) of **12** on the carbonyl carbon C(3) of **14** to give a protonated enamine intermediate, which subsequently reacts with **13**; **(c)** Knoevenagel route entailing an initial direct addition of the carbon C(2) of **14** on the carbonyl carbon of **13** to give the carbenium ion intermediate (Knoevenagel's adduct), which reacts with **12** (a direct addition of the amino group at the C(3) position of **12** on the  $\beta$ -carbon of the adduct and a direct addition of the nucleophilic N(2) center of **12** on the carbonyl carbon C(3) of the adduct); **(d)** imine route entailing an initial direct addition of the N(2) of **12** on the carbonyl carbon of **13** to give an imine intermediate, which reacts with ethyl 3-oxobutanoate **14**; **(e)** enamine route entailing an initial direct addition of the amino group at the C(3) position of **12** on the carbonyl carbon C(3) of **14** to give an enamine intermediate, which subsequently reacts with **13**; **(f)** Knoevenagel route entailing, once formed Knoevenagel's adduct as described in point (c), a direct addition of the amino group at the C(3) position of **12** on the carbonyl carbon C(3) of the adduct and a direct addition of the nucleophilic N(2) center of **12** on the  $\beta$ -carbon of the adduct.

**Table S7.** Anti-DENV-2, anti-WNV, and anti-SARS-CoV-2 activity, and cytotoxicity of TZP derivatives **23-30** synthesized in this study.

| Compd      | Anti-DENV-2 activity (Huh7 cells) EC <sub>50</sub> , μM <sup>a</sup> | Anti-WNV activity (Huh7 cells) EC <sub>50</sub> , μM <sup>a</sup> | Cytotoxicity (Huh7 cells) CC <sub>50</sub> , μM <sup>b</sup> | Anti-SARS-CoV-2 activity (A549 cells) EC <sub>50</sub> , μM <sup>c</sup> | Cytotoxicity (A549 cells) CC <sub>50</sub> , μM <sup>b</sup> |
|------------|----------------------------------------------------------------------|-------------------------------------------------------------------|--------------------------------------------------------------|--------------------------------------------------------------------------|--------------------------------------------------------------|
| <b>23</b>  | NA                                                                   | NA                                                                | >243                                                         | NA                                                                       | >243                                                         |
| <b>29</b>  | NA                                                                   | NA                                                                | >243                                                         | NA                                                                       | >243                                                         |
| <b>24</b>  | NA                                                                   | NA                                                                | >243                                                         | NA                                                                       | 112.3                                                        |
| <b>25</b>  | 4.3 ± 1.5                                                            | 6.7 ± 3.7                                                         | 20.9                                                         | NA                                                                       | 9.8                                                          |
| <b>26</b>  | 14.1 ± 4.1                                                           | 19.3 ± 1.4                                                        | 141.1                                                        | NA                                                                       | 99.9                                                         |
| <b>30</b>  | NA                                                                   | NA                                                                | >243                                                         | NA                                                                       | >243                                                         |
| <b>27</b>  | NA                                                                   | NA                                                                | >243                                                         | NA                                                                       | >243                                                         |
| <b>28</b>  | NA                                                                   | NA                                                                | >243                                                         | NA                                                                       | >243                                                         |
| <b>NRM</b> | -                                                                    | -                                                                 | -                                                            | 0.066 ± 0.007                                                            | 36                                                           |
| <b>SOF</b> | 8.1 ± 1.1                                                            | 5.3 ± 2.5                                                         | >243                                                         | >243                                                                     | >243                                                         |

<sup>a</sup> Activity of the compounds as determined by immunodetection assay. The EC<sub>50</sub> value represents the compound concentration that reduces by 50% the expression of flavivirus envelope proteins in Huh7 cells infected with DENV or WNV. All the reported values represent the means ± SD of data derived from at least two independent experiments in duplicate. <sup>b</sup> Cytotoxicity of the compounds as determined by Cell Titer assay in A549 and Huh cell lines. The CC<sub>50</sub> value represents the compound concentration that causes a decrease of cell viability of 50%. <sup>c</sup> Activity of the compounds as determined by Cell Titer. The EC<sub>50</sub> value represents the compound concentration that reduces by 50% the cytopathic effect in A549 cells infected with SARS-CoV-2. All the reported values represent the means ± SD of data derived from at least two independent experiments in duplicate. <sup>d</sup>NA = not active. <sup>e</sup>ND = not determined due to solubility issues.



Figure S7. <sup>1</sup>H NMR spectrum of compound **8**.



Figure S8. <sup>13</sup>C NMR spectrum of compound **8**.



Figure S9.  $^1\text{H}$  NMR spectrum of compound **9**.



Figure S10.  $^{13}\text{C}$  NMR spectrum of compound **9**.



Figure S11.  $^1\text{H}$  NMR spectrum of compound 10.



Figure S12.  $^{13}\text{C}$  NMR spectrum of compound 10.



Figure S13. <sup>1</sup>H NMR spectrum of compound 11.



Figure S14. <sup>13</sup>C NMR spectrum of compound 11.





Figure S17. <sup>1</sup>H NMR spectrum of compound 17.



Figure S18. <sup>13</sup>C NMR spectrum of compound 17.





Figure S21. <sup>1</sup>H NMR spectrum of compound 19.



Figure S22. <sup>13</sup>C NMR spectrum of compound 19.



Figure S23.  $^1\text{H}$  NMR spectrum of compound **23**.



Figure S24.  $^{13}\text{C}$  NMR spectrum of compound **23**.



Figure S25.  $^1\text{H}$  NMR spectrum of compound 24.



Figure S26.  $^{13}\text{C}$  NMR spectrum of compound 24.



Figure S27.  $^1\text{H}$  NMR spectrum of compound 25.



Figure S28.  $^{13}\text{C}$  NMR spectrum of compound 25.



Figure S29. <sup>1</sup>H NMR spectrum of compound 26.



Figure S30. <sup>13</sup>C NMR spectrum of compound 26.



Figure S31. <sup>1</sup>H NMR spectrum of compound 27.



Figure S32. <sup>13</sup>C NMR spectrum of compound 27.



Figure S33.  $^1\text{H}$  NMR spectrum of compound **28**.



Figure S34.  $^{13}\text{C}$  NMR spectrum of compound **28**.



Figure S35. <sup>1</sup>H NMR spectrum of compound 29.



Figure S36. <sup>13</sup>C NMR spectrum of compound 29.



Figure S37. <sup>1</sup>H NMR spectrum of compound 30.



Figure S38. <sup>13</sup>C NMR spectrum of compound 30.



Figure S39. HRMS spectrum of compound 8.



Figure S40. HRMS spectrum of compound 9.



**Figure S41.** HRMS spectrum of compound 10.



**Figure S42.** HRMS spectrum of compound 11.

## MS Zoomed Spectrum



## MS Spectrum Peak List

| m/z       | z | Abund     | Formula                                                       | Ion                |
|-----------|---|-----------|---------------------------------------------------------------|--------------------|
| 402.15619 | 1 | 367473.81 | C <sub>22</sub> H <sub>19</sub> N <sub>5</sub> O <sub>3</sub> | (M+H) <sup>+</sup> |
| 403.15968 | 1 | 88893.8   | C <sub>22</sub> H <sub>19</sub> N <sub>5</sub> O <sub>3</sub> | (M+H) <sup>+</sup> |
| 404.16214 | 1 | 12199.38  | C <sub>22</sub> H <sub>19</sub> N <sub>5</sub> O <sub>3</sub> | (M+H) <sup>+</sup> |
| 405.16341 | 1 | 1433.93   | C <sub>22</sub> H <sub>19</sub> N <sub>5</sub> O <sub>3</sub> | (M+H) <sup>+</sup> |

Figure S43. HRMS spectrum of compound 23.

## MS Zoomed Spectrum



## MS Spectrum Peak List

| m/z       | z | Abund    | Formula                                                       | Ion                |
|-----------|---|----------|---------------------------------------------------------------|--------------------|
| 373.14145 | 1 | 97002.26 | C <sub>20</sub> H <sub>16</sub> N <sub>6</sub> O <sub>2</sub> | (M+H) <sup>+</sup> |
| 374.14408 | 1 | 22289.84 | C <sub>20</sub> H <sub>16</sub> N <sub>6</sub> O <sub>2</sub> | (M+H) <sup>+</sup> |
| 375.14602 | 1 | 3004.99  | C <sub>20</sub> H <sub>16</sub> N <sub>6</sub> O <sub>2</sub> | (M+H) <sup>+</sup> |
| 376.14973 | 1 | 159.01   | C <sub>20</sub> H <sub>16</sub> N <sub>6</sub> O <sub>2</sub> | (M+H) <sup>+</sup> |

Figure S44. HRMS spectrum of compound 24.

## MS Zoomed Spectrum



## MS Spectrum Peak List

| m/z       | z | Abund     | Formula                                                       | Ion                |
|-----------|---|-----------|---------------------------------------------------------------|--------------------|
| 463.18877 | 1 | 279042.94 | C <sub>27</sub> H <sub>22</sub> N <sub>6</sub> O <sub>2</sub> | (M+H) <sup>+</sup> |
| 464.19234 | 1 | 83945.49  | C <sub>27</sub> H <sub>22</sub> N <sub>6</sub> O <sub>2</sub> | (M+H) <sup>+</sup> |
| 465.19464 | 1 | 12806.78  | C <sub>27</sub> H <sub>22</sub> N <sub>6</sub> O <sub>2</sub> | (M+H) <sup>+</sup> |
| 466.19689 | 1 | 1684.45   | C <sub>27</sub> H <sub>22</sub> N <sub>6</sub> O <sub>2</sub> | (M+H) <sup>+</sup> |

Figure S45. HRMS spectrum of compound 25.

## MS Zoomed Spectrum



## MS Spectrum Peak List

| m/z       | z | Abund     | Formula                                                       | Ion                |
|-----------|---|-----------|---------------------------------------------------------------|--------------------|
| 402.15669 | 1 | 268008.88 | C <sub>22</sub> H <sub>19</sub> N <sub>5</sub> O <sub>3</sub> | (M+H) <sup>+</sup> |
| 403.1601  | 1 | 66583.88  | C <sub>22</sub> H <sub>19</sub> N <sub>5</sub> O <sub>3</sub> | (M+H) <sup>+</sup> |
| 404.16256 | 1 | 9314.01   | C <sub>22</sub> H <sub>19</sub> N <sub>5</sub> O <sub>3</sub> | (M+H) <sup>+</sup> |
| 405.16529 | 1 | 974.6     | C <sub>22</sub> H <sub>19</sub> N <sub>5</sub> O <sub>3</sub> | (M+H) <sup>+</sup> |

Figure S46. HRMS spectrum of compound 26.

## MS Zoomed Spectrum



## MS Spectrum Peak List

| m/z       | z | Abund     | Formula                                                       | Ion                |
|-----------|---|-----------|---------------------------------------------------------------|--------------------|
| 373.14107 | 1 | 280274.94 | C <sub>20</sub> H <sub>16</sub> N <sub>6</sub> O <sub>2</sub> | (M+H) <sup>+</sup> |
| 374.14451 | 1 | 61352.8   | C <sub>20</sub> H <sub>16</sub> N <sub>6</sub> O <sub>2</sub> | (M+H) <sup>+</sup> |
| 375.14679 | 1 | 7919.77   | C <sub>20</sub> H <sub>16</sub> N <sub>6</sub> O <sub>2</sub> | (M+H) <sup>+</sup> |
| 376.14815 | 1 | 599.68    | C <sub>20</sub> H <sub>16</sub> N <sub>6</sub> O <sub>2</sub> | (M+H) <sup>+</sup> |

Figure S47. HRMS spectrum of compound 27.

## MS Zoomed Spectrum



## MS Spectrum Peak List

| m/z       | z | Abund     | Formula                                                       | Ion                |
|-----------|---|-----------|---------------------------------------------------------------|--------------------|
| 463.18948 | 1 | 341033.75 | C <sub>27</sub> H <sub>22</sub> N <sub>6</sub> O <sub>2</sub> | (M+H) <sup>+</sup> |
| 464.19315 | 1 | 101310.88 | C <sub>27</sub> H <sub>22</sub> N <sub>6</sub> O <sub>2</sub> | (M+H) <sup>+</sup> |
| 465.19528 | 1 | 16370.75  | C <sub>27</sub> H <sub>22</sub> N <sub>6</sub> O <sub>2</sub> | (M+H) <sup>+</sup> |
| 466.19814 | 1 | 2097.52   | C <sub>27</sub> H <sub>22</sub> N <sub>6</sub> O <sub>2</sub> | (M+H) <sup>+</sup> |

Figure S48. HRMS spectrum of compound 28.

## MS Zoomed Spectrum



## MS Spectrum Peak List

| m/z       | z | Abund     | Formula                                                       | Ion                |
|-----------|---|-----------|---------------------------------------------------------------|--------------------|
| 374.12503 | 1 | 261949.42 | C <sub>20</sub> H <sub>15</sub> N <sub>5</sub> O <sub>3</sub> | (M+H) <sup>+</sup> |
| 375.12828 | 1 | 57341.76  | C <sub>20</sub> H <sub>15</sub> N <sub>5</sub> O <sub>3</sub> | (M+H) <sup>+</sup> |
| 376.13065 | 1 | 8055.77   | C <sub>20</sub> H <sub>15</sub> N <sub>5</sub> O <sub>3</sub> | (M+H) <sup>+</sup> |
| 377.13225 | 1 | 862.65    | C <sub>20</sub> H <sub>15</sub> N <sub>5</sub> O <sub>3</sub> | (M+H) <sup>+</sup> |

Figure S49. HRMS spectrum of compound 29.

## MS Zoomed Spectrum



## MS Spectrum Peak List

| m/z       | z | Abund     | Formula                                                       | Ion                |
|-----------|---|-----------|---------------------------------------------------------------|--------------------|
| 374.12512 | 1 | 182598.25 | C <sub>20</sub> H <sub>15</sub> N <sub>5</sub> O <sub>3</sub> | (M+H) <sup>+</sup> |
| 375.12821 | 1 | 41201.47  | C <sub>20</sub> H <sub>15</sub> N <sub>5</sub> O <sub>3</sub> | (M+H) <sup>+</sup> |
| 376.13063 | 1 | 5731.13   | C <sub>20</sub> H <sub>15</sub> N <sub>5</sub> O <sub>3</sub> | (M+H) <sup>+</sup> |
| 377.13311 | 1 | 379.1     | C <sub>20</sub> H <sub>15</sub> N <sub>5</sub> O <sub>3</sub> | (M+H) <sup>+</sup> |

Figure S50. HRMS spectrum of compound 30.



**Peak Information**

| # | Peak Name | CH | tR [min] | Area [ $\mu\text{V}\cdot\text{sec}$ ] | Height [ $\mu\text{V}$ ] | Area%  | Height% | Quantity |
|---|-----------|----|----------|---------------------------------------|--------------------------|--------|---------|----------|
| 1 | Unknown   | 5  | 3.213    | 14019501                              | 862507                   | 99.930 | 99.920  | N/A      |
| 2 | Unknown   | 5  | 4.747    | 9783                                  | 691                      | 0.070  | 0.080   | N/A      |

**Figure S51.** HPLC chromatogram of compound **23**.



**Peak Information**

| # | Peak Name | CH | tR [min] | Area [ $\mu\text{V}\cdot\text{sec}$ ] | Height [ $\mu\text{V}$ ] | Area%   | Height% | Quantity |
|---|-----------|----|----------|---------------------------------------|--------------------------|---------|---------|----------|
| 1 | Unknown   | 5  | 6.837    | 20510696                              | 734355                   | 100.000 | 100.000 | N/A      |

**Figure S52.** HPLC chromatogram of compound **24**.



**Peak Information**

| # | Peak Name | CH | tR [min] | Area [µV·sec] | Height [µV] | Area%  | Height% | Quantity |
|---|-----------|----|----------|---------------|-------------|--------|---------|----------|
| 1 | Unknown   | 5  | 2.663    | 90679         | 9931        | 0.210  | 0.642   | N/A      |
| 2 | Unknown   | 5  | 5.700    | 42996932      | 1537144     | 99.790 | 99.358  | N/A      |

**Figure S53.** HPLC chromatogram of compound 25.



**Peak Information**

| # | Peak Name | CH | tR [min] | Area [µV·sec] | Height [µV] | Area%  | Height% | Quantity |
|---|-----------|----|----------|---------------|-------------|--------|---------|----------|
| 1 | Unknown   | 5  | 1.733    | 4583          | 1366        | 0.094  | 0.339   | N/A      |
| 2 | Unknown   | 5  | 1.903    | 15724         | 2802        | 0.321  | 0.695   | N/A      |
| 3 | Unknown   | 5  | 2.203    | 20818         | 1839        | 0.425  | 0.456   | N/A      |
| 4 | Unknown   | 5  | 3.010    | 4819365       | 395764      | 98.382 | 98.196  | N/A      |
| 5 | Unknown   | 5  | 3.730    | 38126         | 1262        | 0.778  | 0.313   | N/A      |

**Figure S54.** HPLC chromatogram of compound 26.



**Peak Information**

| # | Peak Name | CH | tR [min] | Area [ $\mu\text{V}\cdot\text{sec}$ ] | Height [ $\mu\text{V}$ ] | Area%  | Height% | Quantity |
|---|-----------|----|----------|---------------------------------------|--------------------------|--------|---------|----------|
| 1 | Unknown   | 5  | 2.123    | 287134                                | 13863                    | 1.898  | 1.917   | N/A      |
| 2 | Unknown   | 5  | 5.550    | 14741310                              | 701137                   | 97.437 | 96.939  | N/A      |
| 3 | Unknown   | 5  | 7.447    | 16253                                 | 1691                     | 0.107  | 0.234   | N/A      |
| 4 | Unknown   | 5  | 7.787    | 47819                                 | 3593                     | 0.316  | 0.497   | N/A      |
| 5 | Unknown   | 5  | 8.237    | 20727                                 | 1585                     | 0.137  | 0.219   | N/A      |
| 6 | Unknown   | 5  | 8.683    | 15757                                 | 1405                     | 0.104  | 0.194   | N/A      |

F

figure S55. HPLC chromatogram of compound 27.



**Peak Information**

| # | Peak Name | CH | tR [min] | Area [ $\mu\text{V}\cdot\text{sec}$ ] | Height [ $\mu\text{V}$ ] | Area%  | Height% | Quantity |
|---|-----------|----|----------|---------------------------------------|--------------------------|--------|---------|----------|
| 1 | Unknown   | 5  | 4.397    | 26106716                              | 1069122                  | 99.985 | 99.976  | N/A      |
| 2 | Unknown   | 5  | 7.030    | 3810                                  | 255                      | 0.015  | 0.024   | N/A      |

**Figure S56.** HPLC chromatogram of compound **28**.



**Peak Information**

| # | Peak Name | CH | tR [min] | Area [μV·sec] | Height [μV] | Area%  | Height% | Quantity |
|---|-----------|----|----------|---------------|-------------|--------|---------|----------|
| 1 | Peak-001  | 5  | 1.860    | 95154         | 6976        | 1.583  | 1.901   | N/A      |
| 2 | Peak-002  | 5  | 2.350    | 5915073       | 360046      | 98.417 | 98.099  | N/A      |

**Figure S57.** HPLC chromatogram of compound **29**.



**Peak Information**

| # | Peak Name | CH | tR [min] | Area [μV·sec] | Height [μV] | Area%   | Height% | Quantity |
|---|-----------|----|----------|---------------|-------------|---------|---------|----------|
| 1 | Unknown   | 5  | 6.947    | 16586408      | 687921      | 100.000 | 100.000 | N/A      |

**Figure S58.** HPLC chromatogram of compound **30**.



**Figure S59.** FT-IR spectrum of compound **8**.



**Figure S60.** FT-IR spectrum of compound **9**.



**Figure S61.** FT-IR spectrum of compound **10**.



**Figure S62.** FT-IR spectrum of compound 11.
